# Supplementary material
Source: PubMed Central journal article supplement (PMC1482580)
Supplement: pnas_0509678103_3.pdf [file pnas_0509678103_3.pdf]

Table 2

| <b>E13.5BS-Sig</b> |  | <b>WT/Ta</b> |
|--------------------|--|--------------|
| Genes              |  |              |
| SHH                |  | 8            |
| Dkk4               |  | 5            |
| Eda                |  | 4.9          |
| Gli;               |  | 3.3          |
| Ltb                |  | 3            |
| Wnt10b             |  | 2.4          |
| Mcpt7              |  | 2.3          |
| Relb;              |  | 2            |
| Ifitm3             |  | 1.8          |
| AL627078           |  | 1.7          |
| 6430527G18Rik      |  | 0.7          |
| E030022H21Rik      |  | 0.6          |
| Chd3               |  | 0.6          |
| Lars               |  | 0.5          |

| <b>E14.5BS-Sig</b> |  | <b>WT/Ta</b> |
|--------------------|--|--------------|
| Genes              |  |              |
| SHH                |  | 10           |
| Dkk4               |  | 6            |
| Eda                |  | 5.8          |
| Sox2               |  | 4.1          |
| Krt1-17            |  | 4.1          |
| Gli;               |  | 3            |
| Ltb                |  | 3            |
| Ptc                |  | 2.8          |
| Relb               |  | 2.5          |
| sostdc1            |  | 2.3          |
| NIM172610          |  | 2            |
| Dusp6              |  | 2            |
| Bmp4               |  | 2            |
| Fgf10              |  | 2            |
| NIM026047          |  | 2            |
| 2310014L17Rik      |  | 1.9          |
| Stfa3              |  | 1.9          |
| Serpina4           |  | 1.9          |
| Hck                |  | 1.9          |
| Rhpn2              |  | 1.8          |
| NIM029341          |  | 1.8          |
| Lfng               |  | 1.8          |
| Prdm1              |  | 1.8          |
| Smoc1              |  | 1.8          |
| 4931413A09Rik      |  | 1.7          |
| Oxtr               |  | 1.7          |
| Gal                |  | 1.6          |
| Arg2               |  | 1.6          |
| Loxl4;             |  | 1.6          |
| 2610014H22Rik      |  | 0.6          |
| Olig1              |  | 0.6          |
| Slc7a3             |  | 0.6          |
| 9430056A22Rik      |  | 0.6          |
| Kdap               |  | 0.6          |

| <b>E16.5BS-Sig</b> |  | <b>WT/Ta</b> |
|--------------------|--|--------------|
| Genes              |  |              |
| Krt1-17            |  | 11.4         |
| SHH                |  | 7.4          |
| Lhx2               |  | 5.1          |
| DKK4               |  | 4.9          |
| 1110056N09Rik      |  | 4.6          |
| Eda                |  | 4.6          |
| Ptc                |  | 3.3          |
| Sox2               |  | 3            |
| Sostdc1            |  | 2.9          |
| MGC36907           |  | 2.8          |
| Ifna6              |  | 2.8          |
| AK028917           |  | 2.7          |
| Tparl              |  | 2.6          |
| 1100001H23Rik      |  | 2.6          |
| AK080961           |  | 2.6          |
| Hes5               |  | 2.5          |
| D830027H13Rik      |  | 2.5          |
| Ywhaz              |  | 2.5          |
| Slc21a12           |  | 2.5          |
| Sox11              |  | 2.5          |
| Cyp3a16            |  | 2.4          |
| Mki67;             |  | 2.4          |
| Hist1h2ab          |  | 2.4          |
| Hist2h4            |  | 2.3          |
| AI115454           |  | 2.3          |
| Gli;               |  | 2.3          |
| Nmyc1              |  | 2.3          |
| X04652             |  | 2.3          |
| Calr4              |  | 2.3          |
| Slc21a12           |  | 2.2          |
| Foxd1              |  | 2.2          |
| Hist2h4            |  | 2.2          |
| LOC328732          |  | 2.2          |
| Usp42              |  | 2.2          |

| <b>E18.5BS-Sig</b> |  | <b>WT/Ta</b> |
|--------------------|--|--------------|
| Genes              |  |              |
| 4631426H08Rik      |  | 15           |
| Krt2-6g            |  | 15           |
| A030004J04Rik      |  | 6            |
| Krt1-c29           |  | 5.4          |
| Kb36               |  | 5.3          |
| Eda                |  | 5.1          |
| Tbx1               |  | 4.5          |
| Elovl3             |  | 4.5          |
| Shh                |  | 4.3          |
| Vdr                |  | 4.1          |
| Camp               |  | 3.8          |
| 1810005K13Rik      |  | 3.3          |
| K-17               |  | 3.2          |
| Krt1-24            |  | 3            |
| Dkk1               |  | 3            |
| Cidec              |  | 2.7          |
| Lhx2               |  | 2.5          |
| Lrrc15             |  | 2.5          |
| Coch               |  | 2.5          |
| Krtcap1            |  | 2.4          |
| Hoxb8              |  | 2.4          |
| Akp2               |  | 2.4          |
| Cyp2g1             |  | 2.3          |
| Alcam              |  | 2.2          |
| Padi3              |  | 2.2          |
| Mcoln3             |  | 2.2          |
| Slco4a1            |  | 2.1          |
| Mt4                |  | 2.1          |
| Sostdc1            |  | 2            |
| Gm973              |  | 2            |
| Rassf6             |  | 2            |
| Krt2-7             |  | 2            |
| E030004N02Rik      |  | 1.9          |
| Gclc               |  | 1.9          |

|               |     |
|---------------|-----|
| A030005L19Rik | 0.6 |
| Ins1          | 0.6 |
| B930011H20Rik | 0.6 |
| 6030498E09Rik | 0.6 |
| Siat7b        | 0.6 |
| S100a3        | 0.6 |
| MOR33-3P      | 0.6 |
| A230057D06Rik | 0.6 |
| Igfbp2        | 0.6 |
| 6330559I19Rik | 0.5 |
| Mslin;        | 0.5 |
| Bcl2l14       | 0.5 |
| Gnat2         | 0.5 |
| Cplx1         | 0.5 |
| Igf1r         | 0.5 |
| 2810439K08Rik | 0.5 |
| U003760       | 0.5 |
| BC010786      | 0.5 |
| Zfp260        | 0.5 |
| AK034350      | 0.5 |
| Ncstn;        | 0.5 |
| LOC327927     | 0.5 |
| U043138       | 0.5 |
| 5730596B20Rik | 0.5 |
| NM_177129     | 0.5 |
| Trim3         | 0.5 |
| Ppp1r14c      | 0.5 |
| AK043195      | 0.5 |
| Zfp297b       | 0.5 |
| Ptprz1        | 0.5 |
| Cxcl13        | 0.5 |
| MGC7793       | 0.4 |
| Kpna4         | 0.4 |
| Ifna7         | 0.4 |
| Prkcabp       | 0.4 |
| Abcd2         | 0.4 |
| Glycam1       | 0.4 |

|               |     |
|---------------|-----|
| 2410140K03Rik | 2.2 |
| Tbx1          | 2.1 |
| Rpl22         | 2.1 |
| 9430020E02Rik | 2.1 |
| Dkk1          | 2.1 |
| Kif5b         | 2.1 |
| 9030612M13Rik | 2.1 |
| Bcl11b        | 2.1 |
| Camk4         | 2   |
| Tor1b         | 2   |
| 9030612M13Rik | 2   |
| Tebp-pending  | 2   |
| A330080J22Rik | 2   |
| BC035291      | 2   |
| Bike-pending  | 2   |
| 2610009E16Rik | 2   |
| Tpbp          | 2   |
| Sgol2         | 1.9 |
| Nudt3         | 1.9 |
| Bicd2         | 1.9 |
| Actb          | 1.9 |
| 1700081L11Rik | 1.9 |
| Smarca4       | 1.9 |
| Bcl11b        | 1.9 |
| Klf13         | 1.9 |
| Cald1         | 1.9 |
| Csnk1a1       | 1.9 |
| Hist1h2bk     | 1.9 |
| A930021H16Rik | 1.9 |
| Dusp6         | 1.9 |
| Ogfr          | 1.9 |
| Gpc3          | 1.9 |
| U039129       | 1.9 |
| Gdm1          | 1.9 |
| 3010021M21Rik | 1.9 |
| LOC231861     | 1.9 |
| C86324        | 1.9 |

|               |     |
|---------------|-----|
| Gpr48         | 1.9 |
| Sox9          | 1.9 |
| Gpr56         | 1.8 |
| Ptc           | 1.8 |
| Hes5          | 1.8 |
| Mlana         | 1.8 |
| Bnc1          | 1.8 |
| Clspn         | 1.8 |
| Hey2          | 1.7 |
| Msx1          | 1.7 |
| Sox2          | 1.7 |
| Inhba         | 1.7 |
| Prlr,AI987712 | 1.7 |
| Ptprv         | 1.7 |
| Gpr125        | 1.7 |
| St14          | 1.7 |
| Hoxc13        | 1.7 |
| Moxd1         | 1.7 |
| Igsf4a        | 1.6 |
| 4930590L20Rik | 1.6 |
| Rbbp4         | 1.6 |
| Adamts18      | 1.6 |
| U166171       | 1.6 |
| Sema3e        | 1.6 |
| Rbp4          | 1.6 |
| Zfp265        | 1.6 |
| Usp26         | 1.6 |
| A930009N24    | 1.6 |
| Gtbbp4        | 1.6 |
| D630004K10Rik | 1.6 |
| Hhip          | 1.6 |
| Gli           | 1.5 |
| Smoc1         | 1.5 |
| Map4k5        | 1.5 |
| Lrrc4         | 1.5 |
| F11r          | 1.5 |
| Sox21         | 1.5 |

MGC47262 0.4  
 Rps13 0.4  
 BC038167 0.4  
 BC027088 0.4  
 Vrn1; 0.3  
 Tmc2 0.3  
 1700018B24Rik 0.3  
 Ryr3 0.3  
 Mapkapk2 0.3  
 Sin3b 0.3  
 Cav3 0.3  
 4933433C11Rik; 0.3  
 A730098A19Rik 0.2  
 B230113C15Rik 0.2

Slc6a6 1.8  
 Edg2; 1.8  
 1700081L11Rik 1.8  
 Dctn1 1.8  
 Ifi202b 1.8  
 Tfap4 1.8  
 1110007A14Rik 1.8  
 Hist1h1b 1.8  
 Cai 1.8  
 Sox4 1.8  
 Wif1 1.8  
 Ltap 1.8  
 Zfp36l2 1.8  
 Lmna 1.8  
 Rhpn2 1.8  
 AA409446 1.8  
 Tgfb2 1.8  
 Ches1 1.8  
 Col12a1 1.8  
 U038103 1.8  
 Iqgap1 1.8  
 Inhba 1.8  
 8430423A01Rik 1.8  
 NM\_133949 1.7  
 Aldo2 1.7  
 Nedd4 1.7  
 Smoc1 1.7  
 Pfn1 1.7  
 Midn 1.7  
 Lmnb1 1.7  
 Mrfap1 1.7  
 MGC37551 1.7  
 6530403D07Rik 1.7  
 Csrp1 1.7  
 Q99L28 1.7  
 6820443O06Rik 1.7  
 G7e 1.7

Bmp8a 1.5  
 Tnni2 1.5  
 4833414E09Rik 1.5  
 Foxd1 1.5  
 Akap6 0.6  
 BC026585 0.6  
 1500017E21Rik 0.6  
 U004947 0.6  
 Glt25d2 0.6  
 Angptl2 0.6  
 Agtr1 0.6  
 Col8a1 0.6  
 Hrasl 0.6  
 Mimp3 0.6  
 A1317395 0.6  
 Kcnn2 0.5  
 Serpinb2 0.5  
 U047613 0.5  
 4930527J03Rik 0.5  
 U103262 0.5  
 Igfbp2 0.5  
 Cpsf5 0.5  
 Rpl29 0.4  
 6430704M03Rik 0.4  
 Atg2 0.01  
 Serpinb3c, 4b 0.004

|               |     |
|---------------|-----|
| Sdccag28      | 1.7 |
| Klf3          | 1.7 |
| Brd1          | 1.7 |
| 4833416I09Rik | 1.7 |
| Ahnak         | 1.7 |
| Hck           | 1.7 |
| Mll3          | 1.7 |
| Rap2b         | 1.7 |
| Sps2          | 1.7 |
| Snf1lk        | 1.7 |
| 1500034E06Rik | 1.7 |
| Fst           | 1.7 |
| Atxn7l3       | 1.7 |
| Gpm6b         | 1.7 |
| Cdk2          | 1.7 |
| 8430423A01Rik | 1.7 |
| Mnab          | 1.7 |
| Amotl1        | 1.7 |
| 1110013J05Rik | 1.7 |
| Plec1         | 1.7 |
| Sh3bp1        | 1.7 |
| Stat2         | 1.7 |
| Vapa          | 1.7 |
| Chd3          | 1.7 |
| Mgat1         | 1.7 |
| Gem           | 1.7 |
| Cirbp         | 1.7 |
| Casp3         | 1.7 |
| 9930116O05Rik | 1.7 |
| Tagln2        | 1.7 |
| 3010021M21Rik | 1.7 |
| Robo1         | 1.7 |
| NM_177054     | 1.7 |
| NM_153489     | 1.7 |
| 4930420O11Rik | 1.7 |
| 6430514H16    | 1.7 |
| 8030486F04Rik | 1.6 |

|               |     |
|---------------|-----|
| Cbr2          | 1.6 |
| Dusp6         | 1.6 |
| Il2ra         | 1.6 |
| LOC330878     | 1.6 |
| Eif3s5        | 1.6 |
| Centd2        | 1.6 |
| Rps7          | 1.6 |
| Ywhaz         | 1.6 |
| 2010005116Rik | 1.6 |
| NRG2          | 1.6 |
| Ptch2;        | 1.6 |
| Tcof1         | 1.6 |
| Hist1h4d      | 1.6 |
| Chd3          | 1.6 |
| Sdc4          | 1.6 |
| C330012F17Rik | 1.6 |
| Top2a         | 1.6 |
| Elavl1        | 1.6 |
| Rgl2;         | 1.6 |
| Col9a3        | 1.6 |
| Prrx1         | 1.6 |
| Refbp2        | 1.6 |
| 2700050F09Rik | 1.6 |
| Trem2c        | 1.6 |
| NM_022012     | 1.6 |
| Rab34         | 1.6 |
| Igsf3         | 1.6 |
| LOC327932     | 1.6 |
| Pnn           | 1.6 |
| Gpc1          | 1.6 |
| Sin3b         | 1.6 |
| Calm3         | 1.6 |
| BC019977      | 1.6 |
| Igsf4         | 1.6 |
| Zfx1b         | 1.6 |
| Crsp2         | 1.6 |
| Fbx29         | 1.6 |

|               |     |
|---------------|-----|
| Cxcr6         | 1.6 |
| Abcg5         | 1.6 |
| U046604       | 1.6 |
| Q8VFX4        | 1.6 |
| Ptpn11        | 1.6 |
| 2610028H07Rik | 1.6 |
| Lama5         | 1.6 |
| A930014C21Rik | 1.6 |
| Lrpap1        | 1.6 |
| Psmc3         | 1.6 |
| 1500015L24Rik | 1.6 |
| Refbp1        | 1.6 |
| Map3k1        | 1.6 |
| Eif4a1        | 1.6 |
| 2410018C20Rik | 1.6 |
| Sox13         | 1.6 |
| Fin16         | 1.6 |
| 4932442K20Rik | 1.6 |
| Mip           | 1.6 |
| Glul          | 1.6 |
| Myh9          | 1.6 |
| 9030217H17Rik | 1.6 |
| U173205       | 1.6 |
| 5730502D15Rik | 1.6 |
| 1700020J09Rik | 1.6 |
| Lbr           | 1.6 |
| U069311       | 1.5 |
| LOC268496     | 1.5 |
| 2310043D08Rik | 1.5 |
| Pdgfra        | 1.5 |
| 4833406P10Rik | 1.5 |
| Rgl2          | 1.5 |
| Gsr           | 1.5 |
| Hadhsc        | 1.5 |
| Lypla2        | 1.5 |
| Mafb          | 1.5 |
| 4930535B03Rik | 1.5 |

|               |     |
|---------------|-----|
| Nrip1         | 1.5 |
| 2700043D08Rik | 1.5 |
| MOR171-1      | 1.5 |
| Fbln1         | 1.5 |
| 2310045K21Rik | 1.5 |
| BC034054      | 1.5 |
| Gnb2          | 1.5 |
| D15Erttd785e  | 1.5 |
| ORF6          | 1.5 |
| Med25         | 1.5 |
| Dusp7         | 1.5 |
| 2210403K04Rik | 0.6 |
| Ankrd29       | 0.6 |
| Lgi3          | 0.6 |
| Sang          | 0.6 |
| Acox2         | 0.6 |
| Mfng;         | 0.6 |
| Otx1          | 0.6 |
| A930003A15Rik | 0.6 |
| Usmg4         | 0.6 |
| Tmprss3       | 0.6 |
| 4832416K17Rik | 0.6 |
| MGC30456      | 0.6 |
| Rhced         | 0.6 |
| 1110067D22Rik | 0.6 |
| Znfn1a4       | 0.6 |
| LOC381251     | 0.6 |
| 2310079N15Rik | 0.6 |
| V1rf3         | 0.6 |
| LOC328246     | 0.6 |
| Txn1          | 0.6 |
| Sqrdl         | 0.6 |
| Pdim5         | 0.6 |
| 2610100K07Rik | 0.6 |
| 1700108M19Rik | 0.6 |
| 2310004K20Rik | 0.6 |
| U004572       | 0.6 |

|               |     |
|---------------|-----|
| NM_139302     | 0.6 |
| Htf9c         | 0.6 |
| Mect1         | 0.6 |
| D16Erttd480e  | 0.6 |
| Al413235      | 0.6 |
| Chst4         | 0.6 |
| Il1f6         | 0.6 |
| Cplx1         | 0.6 |
| Sparcl1       | 0.6 |
| Gjc1          | 0.6 |
| LOC270103     | 0.6 |
| Wdr7          | 0.6 |
| Spo11         | 0.6 |
| 6330411F23Rik | 0.6 |
| LOC224552     | 0.6 |
| Olig1         | 0.6 |
| U036754       | 0.6 |
| Elf4          | 0.6 |
| Slc14a2       | 0.6 |
| Tpm1          | 0.6 |
| Cdrap         | 0.6 |
| Ccr8          | 0.6 |
| 1600014E20Rik | 0.6 |
| Cgref1        | 0.6 |
| Spi8          | 0.6 |
| 1620401E04Rik | 0.6 |
| 4631416L12Rik | 0.6 |
| MOR267-7      | 0.6 |
| D730046L02Rik | 0.5 |
| 2310057N15Rik | 0.5 |
| Gabraq        | 0.5 |
| Dm9           | 0.5 |
| Q8VFG8        | 0.5 |
| 2310031A18Rik | 0.5 |
| 1110012D08Rik | 0.5 |
| Smt3h1        | 0.5 |
| Ins1          | 0.5 |



|                |     |
|----------------|-----|
| Brf2           | 0.5 |
| U212558        | 0.5 |
| LOC329333      | 0.5 |
| 310001N19Rik   | 0.5 |
| 2610025P08Rik  | 0.5 |
| 2700046G09Rik  | 0.5 |
| MOR258-4P      | 0.5 |
| U039716        | 0.5 |
| BC033596       | 0.5 |
| Myoc           | 0.5 |
| 4930535E21Rik  | 0.5 |
| F5             | 0.5 |
| Elys           | 0.5 |
| 2310046A06Rik  | 0.5 |
| 1110020A21Rik  | 0.5 |
| Cxcl13, Scyb13 | 0.5 |
| 2810439K08Rik  | 0.5 |
| D930038M13Rik  | 0.5 |
| S100a3         | 0.5 |
| Slc7a3         | 0.5 |
| Fkbp10         | 0.5 |
| G6pc           | 0.5 |
| 4933433D23Rik  | 0.5 |
| H2-Dma         | 0.5 |
| Cnm3           | 0.5 |
| 8430430B14Rik  | 0.5 |
| Cnksr1         | 0.5 |
| C430041M20     | 0.5 |
| 4933409D10Rik  | 0.5 |
| 9130207N01     | 0.5 |
| 4930599N23Rik  | 0.4 |
| Ncstn          | 0.4 |
| 6030498E09Rik  | 0.4 |
| Gnat2          | 0.4 |
| 2610014H22Rik  | 0.4 |
| Prkcb          | 0.4 |
| 6330559I19Rik  | 0.4 |

|               |     |
|---------------|-----|
| Yars          | 0.4 |
| Nfya          | 0.4 |
| 4921517D21Rik | 0.4 |
| Mid1          | 0.4 |
| Epqn-pending  | 0.4 |
| Igfbp2        | 0.4 |
| Ptprz1        | 0.4 |
| NM_022007     | 0.4 |
| LOC269211     | 0.4 |
| 2410044K02Rik | 0.4 |
| LOC327927     | 0.4 |
| Igf1r         | 0.4 |
| U018284       | 0.4 |
| Siat7b        | 0.4 |
| 4930481A15Rik | 0.4 |
| D330045A20Rik | 0.4 |
| A230106N23    | 0.4 |
| Ccl19         | 0.4 |
| 2810011M08Rik | 0.4 |
| 5830472F04Rik | 0.4 |
| 2310061A22Rik | 0.4 |
| Trpv2         | 0.4 |
| Bcl2l14       | 0.4 |
| Gpnat1        | 0.4 |
| 0710001O03Rik | 0.4 |
| Upa           | 0.4 |
| H2-DMb1       | 0.4 |
| Mylpc         | 0.4 |
| U004947       | 0.4 |
| Zfp260        | 0.4 |
| U003760       | 0.4 |
| Gnb5          | 0.4 |
| 0710001B24Rik | 0.4 |
| Olf1360       | 0.4 |
| 4931407K02Rik | 0.4 |
| 5730405M13Rik | 0.4 |
| NM_177129     | 0.4 |

|               |     |
|---------------|-----|
| 5730596B20Rik | 0.4 |
| Lrrc3         | 0.4 |
| U043138       | 0.4 |
| Add2          | 0.4 |
| BC010786      | 0.4 |
| 4832412O06Rik | 0.4 |
| Neurod2       | 0.4 |
| Trim3         | 0.4 |
| 4930500E24Rik | 0.3 |
| Rho           | 0.3 |
| F7            | 0.3 |
| Slc17a7       | 0.3 |
| Ppp1r14c      | 0.3 |
| 2810453K03Rik | 0.3 |
| MGC7793       | 0.3 |
| 4632401C08Rik | 0.3 |
| U130061       | 0.3 |
| 2310067G05Rik | 0.3 |
| Abcd2         | 0.3 |
| Ifna7         | 0.3 |
| Ii            | 0.3 |
| Agmat         | 0.3 |
| Prkcbp        | 0.3 |
| U062765       | 0.3 |
| Adamts4       | 0.3 |
| Vr11          | 0.3 |
| Ltap          | 0.3 |
| Ptprz1        | 0.3 |
| Zfp297b       | 0.3 |
| Trim68        | 0.3 |
| 2810409K11Rik | 0.3 |
| 4933432P15Rik | 0.3 |
| BC027088      | 0.3 |
| Mrps17        | 0.3 |
| U031828       | 0.3 |
| Paip1-pending | 0.3 |
| 5330435L01Rik | 0.3 |

|               |     |
|---------------|-----|
| Rbm12         | 0.3 |
| 1700018B24Rik | 0.3 |
| Tmc2          | 0.3 |
| MGC47262      | 0.3 |
| LOC329519     | 0.3 |
| 9230102O04Rik | 0.3 |
| U097269       | 0.3 |
| Tcp11         | 0.3 |
| Fkh10         | 0.3 |
| Coro2a        | 0.3 |
| Sin3b         | 0.3 |
| BC038167      | 0.3 |
| Rps13         | 0.3 |
| 1700013B03Rik | 0.3 |
| Siat7e        | 0.3 |
| Ryr3          | 0.2 |
| Cav3          | 0.2 |
| Glycam1       | 0.2 |
| U007351       | 0.2 |
| 4933433C11Rik | 0.2 |
| 4933401E19Rik | 0.2 |
| A730098A19Rik | 0.2 |
| Syt6          | 0.2 |
| Slc9a4        | 0.2 |
| B230113C15Rik | 0.2 |
| Pgk2          | 0.2 |
| Mapkapk2      | 0.2 |
| NM_172629     | 0.2 |
