# Supplementary material
Source: PubMed Central journal article supplement (PMC1482580)
Supplement: pnas_0509678103_4.pdf [file pnas_0509678103_4.pdf]

Table 3. Genes up-regulated in EDA-A1 transgenic skin

|             | WTTG/WT* |
|-------------|----------|
| EDA-A1 (tg) | 250      |
| Dkk4        | -        |
| Dkk1        | 8.4      |
| Wif1        | 6.6      |
| Kremen2     | 10.8     |
| Wnt10b      | 5.3      |
| Wnt6        | 2.7      |
| Wnt5a       | (2.1)    |
| Wnt11       | (1.9)    |
| Lef1        | 4.7      |
| Shh         | 23       |
| Ptc         | 5.3      |
| Gli1        | 6.4      |
| Hhip        | 4.0      |
| LTb         | 1.7      |
| RelB        | 1.9      |
| Sostdc1     | 2.7      |
| Krt1-17     | 2.6      |
| c-fos       | 8.8      |

\*Fold differences from real-time PCR assays except parenthesized that from microarray.

-, expression not detectable in adult skin (see text).
