# Supplementary material
Source: PubMed Central journal article supplement (PMC1482580)

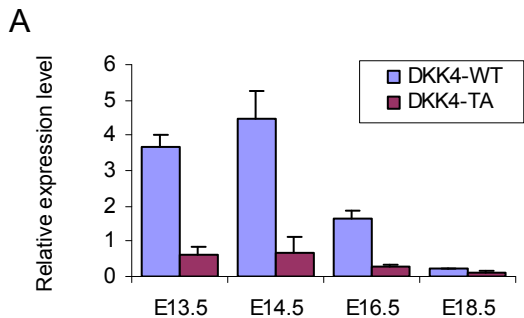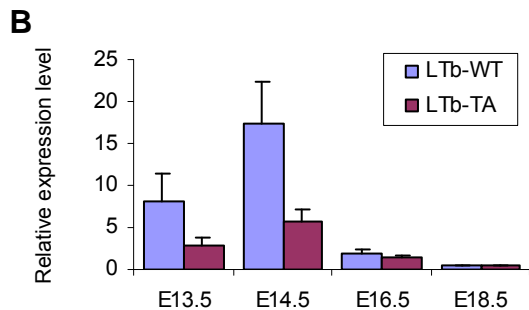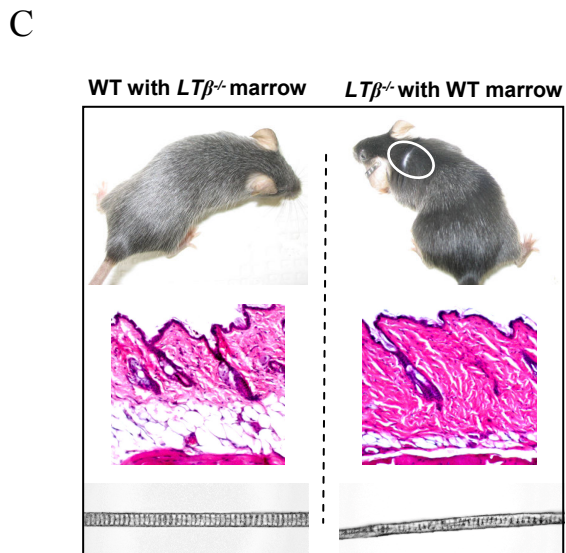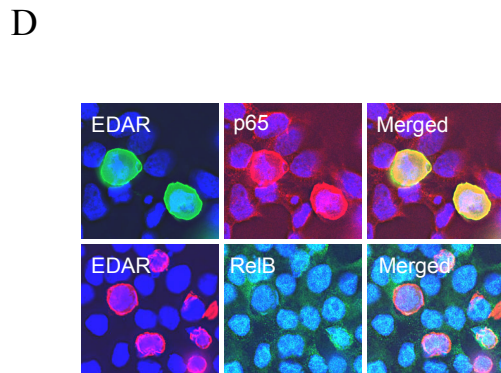

Supplement: pnas_0509678103_2.pdf [file pnas_0509678103_2.pdf]
